# Supplementary material
Source: PubMed Central journal article supplement (PMC2820418)

**Supplementary Figure 1: PRG5 induces filopodia independently of mDia1.**

**A**, Neuronal cells were transfected with dominant negative mDia1 (mDia $\Delta$ N2) and neurite growth and filopodia formation were monitored. Note, that neurons expressing dominant negative mDia1 show cell rounding. **B**, PRG5 expressing neurons cotransfected with mDia1 $\Delta$ N2 dramatic filopodia growth. Representative images of mDia1  $\Delta$ N2 (green) and PRG5 (red) expressing neurons are displayed. Nuclei are shown in blue. Scale bar represents 20  $\mu$ m.

**A**

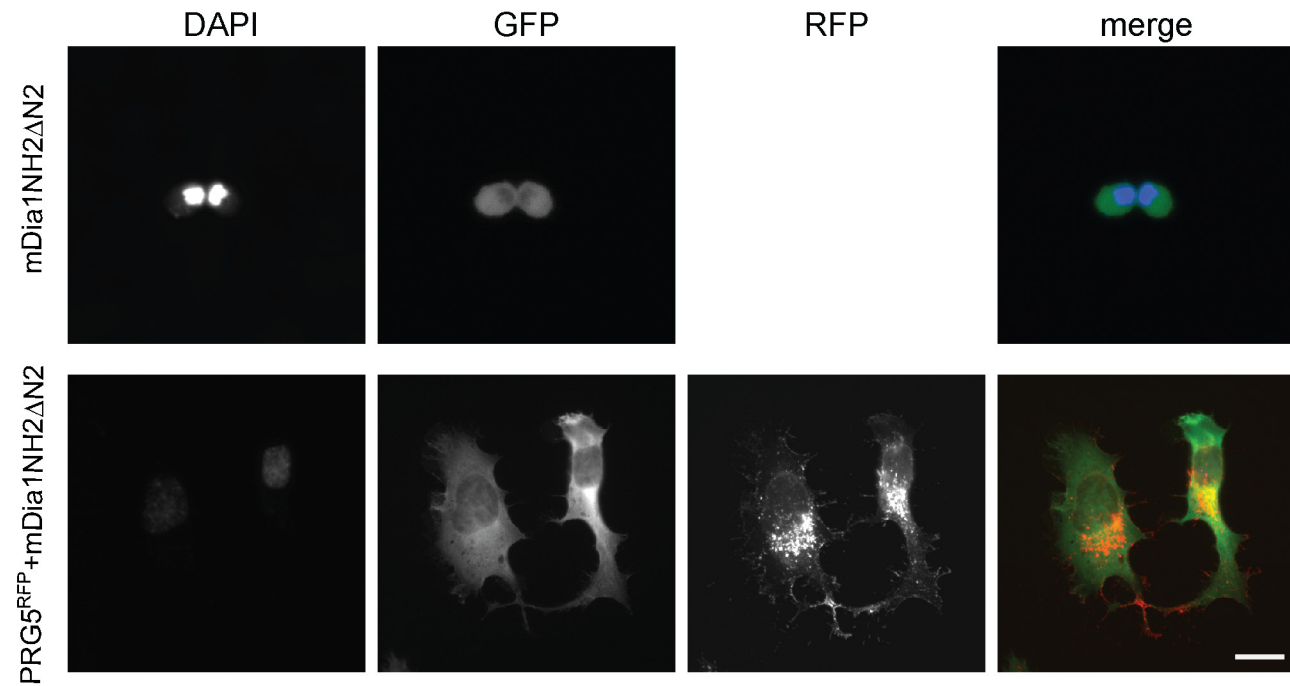

Supplement: E09-06-0506_1.pdf [file E09-06-0506_1.pdf]
